# Supplementary material for: Food Addiction Symptoms and Amygdala Response in Fasted and Fed States
Source: MDPI journal article supplement (doi:10.3390/nu11061285), 2019-06-06
Supplement: s1 [file s1]

**Table S1.** Nutritional composition of food image groups per 100 g.

|                    | <b>High-Calorie Food Group</b> | <b>Low-Calorie Food Group</b> |
|--------------------|--------------------------------|-------------------------------|
| Energy (kJ) *      | 1440.6 ± 552.1                 | 156.1 ± 79.5                  |
| (kCal) *           | 344.3 ± 132.0                  | 37.3 ± 19.0                   |
| Protein (g) *      | 7.3 ± 3.7                      | 1.3 ± 1.0                     |
| Fat (g) *          | 16.6 ± 9.9                     | 0.2 ± 0.1                     |
| Carbohydrate (g) * | 40.3 ± 20.0                    | 6.2 ± 5.1                     |

\*= p < 0.001 high-calorie vs low-calorie. Data is presented as mean ± SD.
